# Supplementary material for: Successional action of Bacteroidota and Firmicutes in decomposing straw polymers in a paddy soil
Source: PubMed Central journal article supplement (PMC10576277; doi:10.1186/s40793-023-00533-6), 2023-10-14

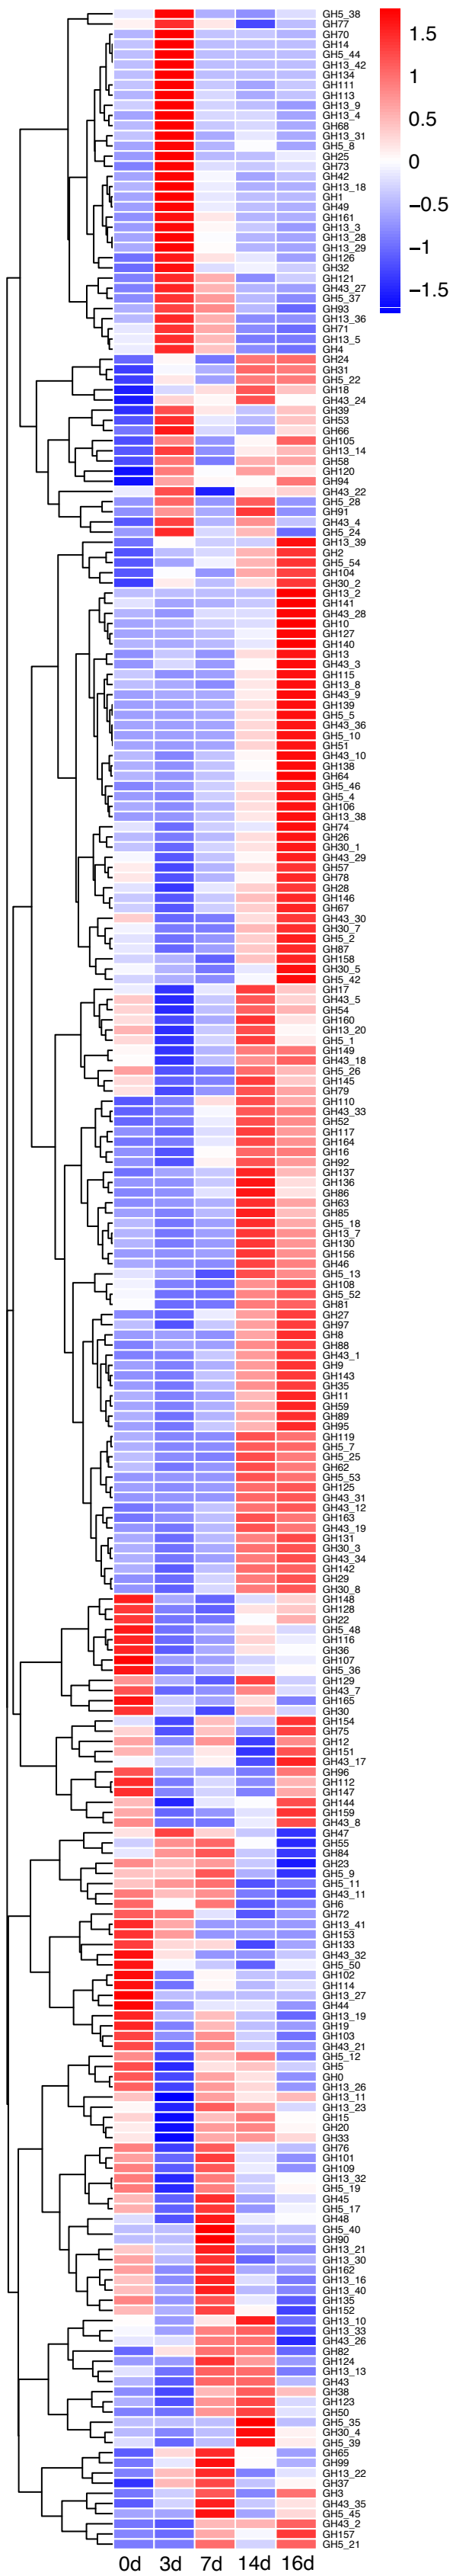

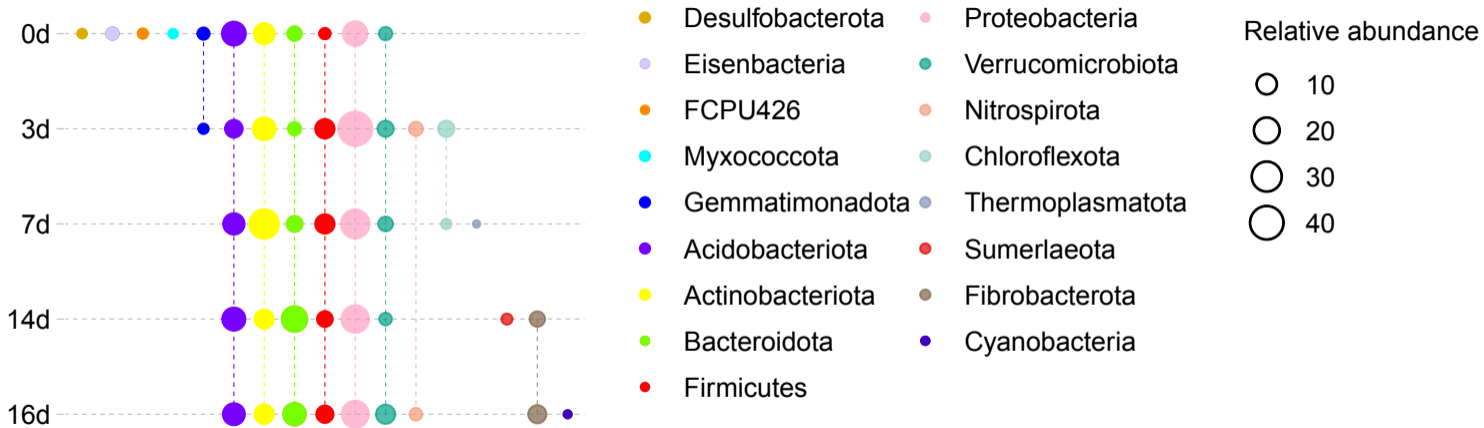

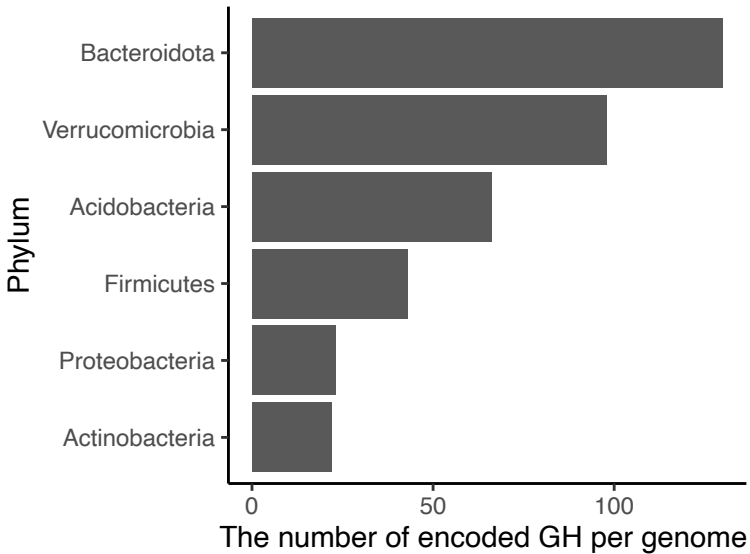

A

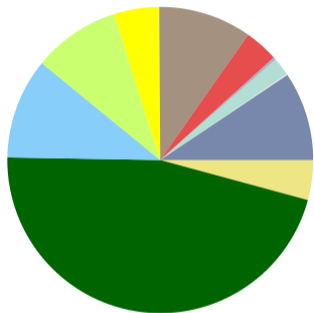

0d

B

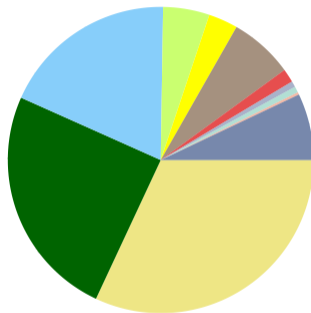

14d

Phylum

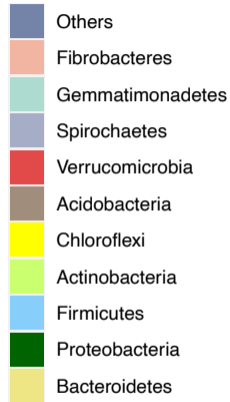

A

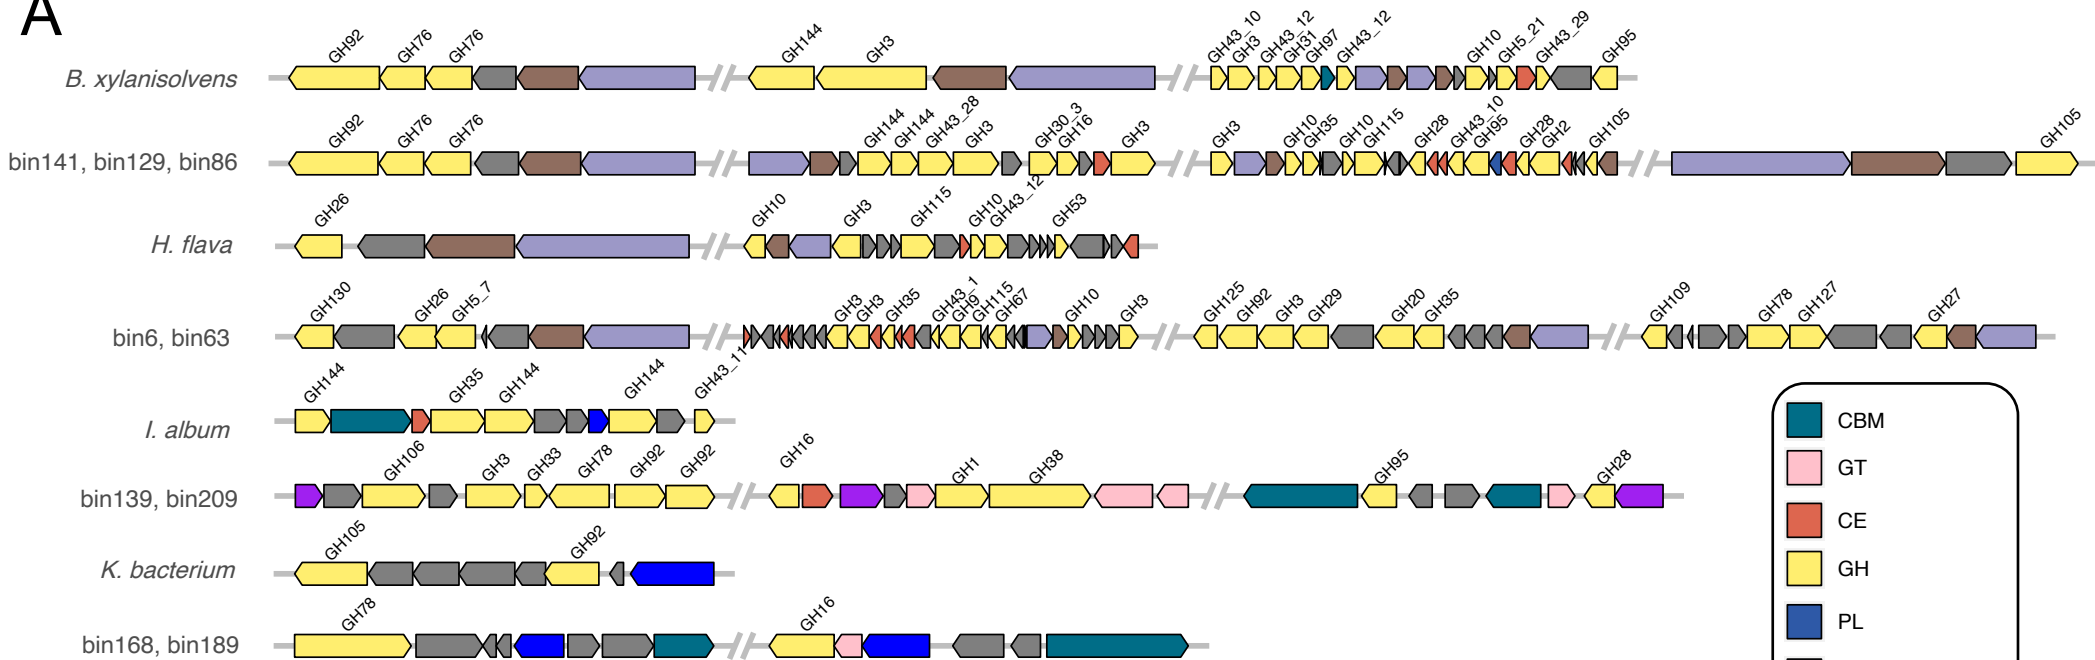

B

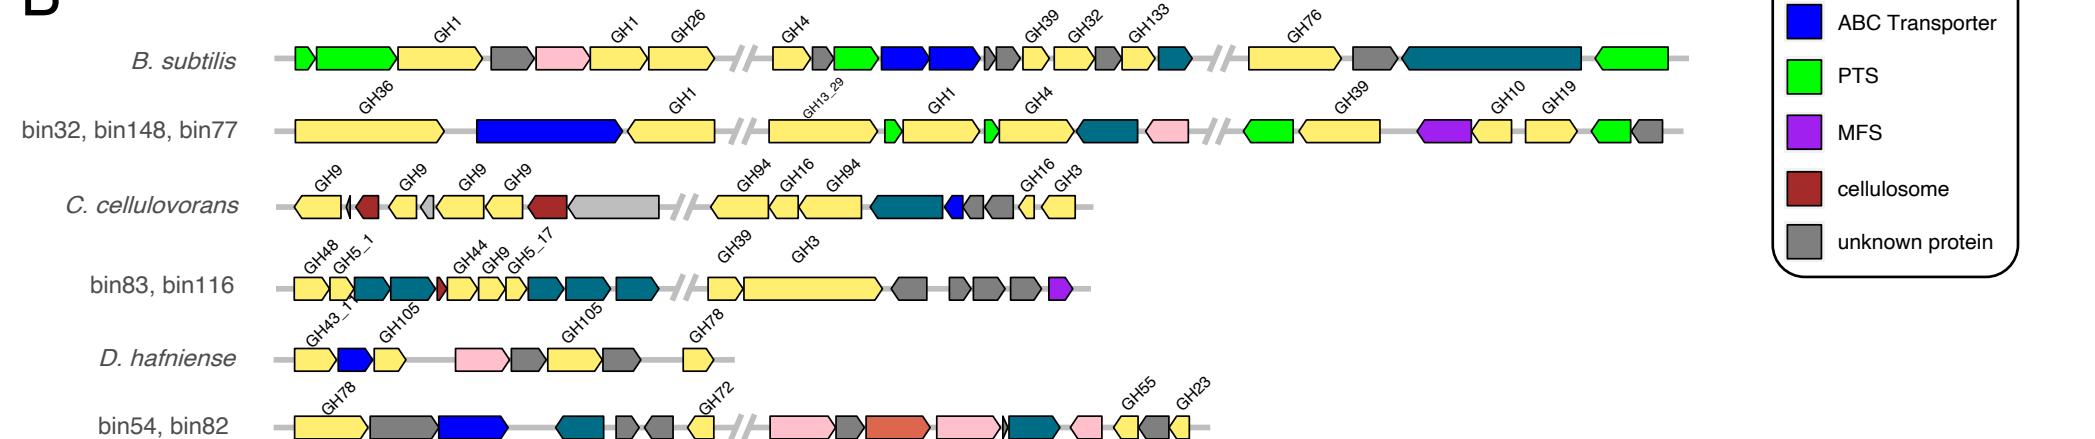

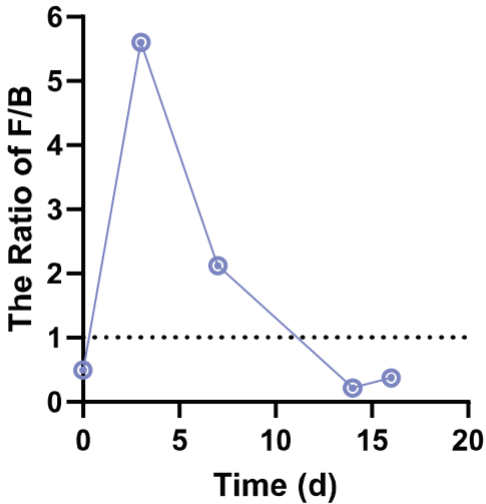

Supplement: 40793_2023_533_MOESM1_ESM.pdf [file 40793_2023_533_MOESM1_ESM.pdf]
